# Supplementary material for: Multifaceted analyses reveal carbohydrate metabolism mainly affecting the quality of postharvest bamboo shoots
Source: Front Plant Sci. 2022 Sep 21;13:1021161. doi: 10.3389/fpls.2022.1021161 (PMC9535365; doi:10.3389/fpls.2022.1021161)
Supplement: Supplementary file 11 [file Table_3.XLSX]

## Sheet: Supplementary Table 3A
Supplementary Table 3A. miRNA sequencing data statistics
Samples	Raw_reads	BaseSum	Length<18	Length>30	Clean_reads	GC(%)	N(%)	Q20(%)	CycleQ20(%)	Q30(%)
S1-1	37754419	1925475369	2195939	1642229	33916251	51.29	0.01	99.3	100	97.65
S1-2	29817434	1520689134	799510	1969744	27048180	50.94	0.01	99.26	100	97.49
S1-3	33184866	1692428166	5574867	605246	27004753	52.02	0.01	99.28	100	97.6
S2-1	31778273	1620691923	2760881	1191362	27826030	51.54	0.01	99.27	100	97.54
S2-2	38773290	1977437790	3331527	1792116	33649647	50.88	0.01	99.3	100	97.66
S2-3	34519810	1760510310	4937811	1351622	28230377	51.53	0.01	99.29	100	97.54
S3-1	42056827	2144898177	3534999	1710028	36811800	51.63	0.01	99.36	100	97.74
S3-2	35297599	1800177549	1478446	3645998	30173155	51.23	0.01	99.27	100	97.53
S3-3	36493103	1861148253	3738569	1694144	31060390	51.87	0.01	99.32	100	97.67
S4-1	38396593	1958226243	1954254	1577352	34864987	51.55	0.01	99.28	100	97.57
S4-2	27171633	1385753283	1092821	2681532	23397280	51.48	0.01	99.29	100	97.52
S4-3	33608569	1714037019	2303718	1691111	29613740	51.65	0.01	99.26	100	97.53

## Sheet: Supplementary Table 3B
Supplementary Table 3B. Length distribution of miRNAs
Samples	18 nt	19 nt	20 nt	21 nt	22 nt	23 nt	24 nt	25 nt	26 nt	27 nt	28 nt	29 nt	30 nt	Known-miRNAs	Novel-miRNAs	Total
S1-1	850626	1669602	1408787	4719332	5268437	2690542	13373225	1469393	705923	590551	459451	398466	311916	40	414	454
S1-2	391825	804338	904348	3378059	4120859	2219133	11670476	1286022	620789	520279	420704	390041	321307	38	414	452
S1-3	1381129	2027548	1744567	4808789	4653338	2039835	8531828	833774	361176	252476	163190	121076	86027	37	415	452
S2-1	791138	1249567	1260867	3919397	4289090	2239694	10816098	1311409	618797	474481	345988	292975	216529	37	415	452
S2-2	827805	1289346	1380486	4614654	5166350	2710545	13517790	1598464	744312	590949	458690	434152	316104	36	415	451
S2-3	966051	1406954	1358966	3945830	4250418	2214401	10435904	1370878	725748	548460	403488	350962	252317	39	415	454
S3-1	1147472	1725733	1845182	5295257	5808900	3012695	13011469	1755559	998717	786802	581719	487640	354655	38	415	453
S3-2	590024	1003592	1199845	3609611	4324888	2464949	11001046	1709494	1089361	950347	809732	791988	628278	37	415	452
S3-3	1087317	1588905	1611531	4227615	4693659	2600362	10013174	1677702	1211405	876137	618871	486263	367449	40	415	455
S4-1	849531	1411047	1622222	4929673	5893145	2948447	12281263	1787101	982180	774670	575156	473443	337109	37	415	452
S4-2	475525	809641	935028	2851314	3502213	1862572	8331224	1341255	823192	730158	631464	617364	486330	36	415	451
S4-3	852710	1315427	1438810	4086661	4783272	2448046	10022348	1564650	905934	745564	574290	504400	371628	37	415	452
Total	10211153	16301700	16710639	50386192	56754569	29451221	133005845	17705701	9787534	7840874	6042743	5348770	4049649	47	415	462
Ratio	0.0280837	0.0448346	0.0459593	0.138577	0.156092	0.0809997	0.365806	0.048696	0.0269187	0.0215648	0.0166194	0.0147107	0.0111378

## Sheet: Supplementary Table 3C
Supplementary Table 3C. miRNA members in each family
miRNA	Family	number
novel_miR_73	MIR167	15
novel_miR_10	MIR167	15
novel_miR_385	MIR167	15
novel_miR_133	MIR167	15
novel_miR_374	MIR167	15
novel_miR_279	MIR167	15
novel_miR_108	MIR167	15
novel_miR_321	MIR167	15
novel_miR_127	MIR167	15
novel_miR_123	MIR167	15
novel_miR_136	MIR167	15
novel_miR_392	MIR167	15
novel_miR_405	MIR167	15
novel_miR_343	MIR167	15
novel_miR_145	MIR167	15
novel_miR_360	MIR166	13
novel_miR_75	MIR166	13
novel_miR_142	MIR166	13
novel_miR_109	MIR166	13
novel_miR_81	MIR166	13
novel_miR_162	MIR166	13
novel_miR_8	MIR166	13
novel_miR_341	MIR166	13
novel_miR_388	MIR166	13
novel_miR_35	MIR166	13
novel_miR_139	MIR166	13
novel_miR_47	MIR166	13
novel_miR_38	MIR166	13
sbi-miR171k	MIR171	12
novel_miR_348	MIR159	12
osa-miR171c-5p	MIR171	12
ssp-miR168a	MIR168	12
osa-miR168a-5p	MIR168	12
sof-miR168a	MIR168	12
osa-miR171b	MIR171	12
novel_miR_411	MIR159	12
zma-miR168a-5p	MIR168	12
novel_miR_236	MIR171	12
osa-miR168a-3p	MIR168	12
zma-miR168b-5p	MIR168	12
novel_miR_105	MIR159	12
novel_miR_50	MIR159	12
ata-miR168-3p	MIR168	12
novel_miR_161	MIR159	12
hvu-miR168-5p	MIR168	12
bdi-miR171a	MIR171	12
novel_miR_234	MIR159	12
novel_miR_3	MIR159	12
novel_miR_214	MIR159	12
novel_miR_367	MIR159	12
zma-miR171b-3p	MIR171	12
novel_miR_61	MIR171	12
novel_miR_65	MIR171	12
novel_miR_114	MIR171	12
osa-miR171c-3p	MIR171	12
zma-miR168a-3p	MIR168	12
novel_miR_174	MIR159	12
novel_miR_316	MIR159	12
novel_miR_231	MIR159	12
novel_miR_278	MIR171	12
hvu-miR168-3p	MIR168	12
zma-miR171b-5p	MIR171	12
zma-miR168b-3p	MIR168	12
ata-miR168-5p	MIR168	12
novel_miR_13	MIR164	10
novel_miR_334	MIR1878	10
novel_miR_170	MIR164	10
novel_miR_137	MIR1878	10
novel_miR_285	MIR164	10
novel_miR_71	MIR164	10
novel_miR_332	MIR164	10
novel_miR_216	MIR164	10
novel_miR_87	MIR1878	10
novel_miR_76	MIR1878	10
novel_miR_192	MIR164	10
novel_miR_270	MIR1878	10
novel_miR_36	MIR1878	10
novel_miR_264	MIR1878	10
novel_miR_181	MIR1878	10
novel_miR_16	MIR164	10
novel_miR_69	MIR164	10
novel_miR_327	MIR164	10
novel_miR_4	MIR1878	10
novel_miR_70	MIR1878	10
novel_miR_229	MIR393	7
novel_miR_261	MIR393	7
novel_miR_382	MIR396	7
zma-miR160g-5p	MIR160	7
sbi-miR160a	MIR160	7
novel_miR_41	MIR393	7
novel_miR_129	MIR393	7
novel_miR_128	MIR396	7
novel_miR_350	MIR396	7
novel_miR_232	MIR393	7
bdi-miR395k-3p	MIR395	7
novel_miR_200	MIR396	7
bdi-miR395k-5p	MIR395	7
bdi-miR395l-3p	MIR395	7
bdi-miR395l-5p	MIR395	7
sbi-miR160b	MIR160	7
novel_miR_204	MIR396	7
zma-miR160g-3p	MIR160	7
novel_miR_330	MIR393	7
osa-miR395q	MIR395	7
osa-miR160a-5p	MIR160	7
novel_miR_30	MIR396	7
osa-miR395n	MIR395	7
sbi-miR160c	MIR160	7
novel_miR_102	MIR393	7
bdi-miR395h-3p	MIR395	7
osa-miR160a-3p	MIR160	7
novel_miR_353	MIR396	7
novel_miR_225	MIR5998	5
novel_miR_23	MIR5998	5
novel_miR_393	MIR5998	5
novel_miR_199	MIR477	5
novel_miR_191	MIR477	5
novel_miR_328	MIR477	5
novel_miR_60	MIR477	5
novel_miR_244	MIR4221	5
novel_miR_217	MIR5998	5
novel_miR_224	MIR4221	5
novel_miR_130	MIR5998	5
novel_miR_408	MIR4221	5
novel_miR_359	MIR4221	5
novel_miR_246	MIR477	5
novel_miR_42	MIR4221	5
novel_miR_361	MIR482	4
novel_miR_110	MIR2118	4
novel_miR_64	MIR482	4
novel_miR_52	MIR2118	4
novel_miR_259	MIR8007	4
novel_miR_155	MIR399	4
novel_miR_90	MIR8007	4
novel_miR_394	MIR482	4
novel_miR_339	MIR399	4
novel_miR_390	MIR399	4
novel_miR_273	MIR8007	4
novel_miR_389	MIR2118	4
novel_miR_329	MIR530	4
novel_miR_338	MIR482	4
novel_miR_32	MIR530	4
novel_miR_44	MIR530	4
novel_miR_245	MIR530	4
osa-miR399k	MIR399	4
novel_miR_202	MIR2118	4
novel_miR_277	MIR8007	4
novel_miR_333	MIR528	3
novel_miR_49	MIR7717	3
novel_miR_186	MIR902	3
novel_miR_2	MIR902	3
novel_miR_380	MIR528	3
osa-miR5079a	MIR5079	3
novel_miR_398	MIR7717	3
novel_miR_27	MIR528	3
novel_miR_28	MIR5079	3
novel_miR_311	MIR902	3
osa-miR5079b	MIR5079	3
novel_miR_63	MIR7717	3
novel_miR_83	MIR5387	2
novel_miR_370	MIR9563	2
novel_miR_196	MIR390	2
novel_miR_298	MIR2619	2
novel_miR_258	MIR390	2
novel_miR_256	MIR169	2
novel_miR_271	MIR8663	2
novel_miR_120	MIR394	2
novel_miR_198	MIR7492	2
novel_miR_1	MIR2619	2
novel_miR_7	MIR6108	2
novel_miR_337	MIR169	2
novel_miR_101	MIR4380	2
novel_miR_116	MIR397	2
novel_miR_366	MIR7506	2
novel_miR_82	MIR1919	2
novel_miR_255	MIR9563	2
novel_miR_226	MIR7492	2
novel_miR_189	MIR5674	2
novel_miR_118	MIR1919	2
novel_miR_165	MIR397	2
novel_miR_169	MIR7506	2
novel_miR_312	MIR6217	2
novel_miR_238	MIR6217	2
novel_miR_400	MIR5387	2
novel_miR_22	MIR394	2
novel_miR_62	MIR5674	2
novel_miR_262	MIR827	2
novel_miR_39	MIR4380	2
novel_miR_407	MIR824	2
novel_miR_210	MIR827	2
novel_miR_93	MIR6108	2
novel_miR_305	MIR8663	2
novel_miR_185	MIR824	2
novel_miR_247	MIR781	1
novel_miR_166	MIR1094	1
novel_miR_274	MIR9677	1
novel_miR_383	MIR156	1
novel_miR_290	MIR319	1
novel_miR_300	MIR837	1
novel_miR_228	MIR3631	1
novel_miR_11	MIR1432	1
novel_miR_144	MIR812	1
novel_miR_95	MIR845	1
novel_miR_86	MIR8167	1
novel_miR_402	MIR6020	1
novel_miR_415	MIR4347	1
novel_miR_243	MIR408	1
novel_miR_409	MIR1144	1
novel_miR_397	MIR1863	1
novel_miR_336	MIR398	1
novel_miR_293	MIR7486	1
novel_miR_371	MIR6145	1
novel_miR_284	MIR947	1
novel_miR_347	MIR2652	1
novel_miR_172	MIR5285	1
novel_miR_357	MIR858	1
novel_miR_354	MIR2871	1
novel_miR_276	MIR6023	1
novel_miR_391	MIR1520	1
novel_miR_99	MIR5225	1
novel_miR_288	MIR8654	1
novel_miR_193	MIR869	1
novel_miR_215	MIR852	1
novel_miR_151	MIR2615	1
novel_miR_249	MIR5272	1
osa-miR535-5p	MIR535	1
novel_miR_240	MIR2108	1
novel_miR_289	MIR2670	1
novel_miR_31	MIR6032	1
novel_miR_413	MIR1024	1
novel_miR_51	MIR2676	1
novel_miR_197	MIR4227	1
novel_miR_310	MIR2109	1
novel_miR_112	MIR3444	1
novel_miR_141	MIR5303	1
osa-miR2275d	MIR2275	1
novel_miR_175	MIR857	1
novel_miR_33	MIR162	1
novel_miR_117	MIR8038	1
novel_miR_14	MIR7726	1
novel_miR_59	MIR6161	1
novel_miR_176	bantam	1
novel_miR_54	MIR4371	1
novel_miR_323	MIR5780	1
novel_miR_283	MIR475	1
novel_miR_178	MIR2111	1
